# Supplementary material for: Blueberry and cranberry pangenomes as a resource for future genetic studies and breeding efforts
Source: PubMed Central journal article supplement (PMC10418200; doi:10.1101/2023.07.31.551392), 2023-08-02
Supplement: NIHPP2023.07.31.551392V1-supplement-1.pdf [file NIHPP2023.07.31.551392V1-supplement-1.pdf]

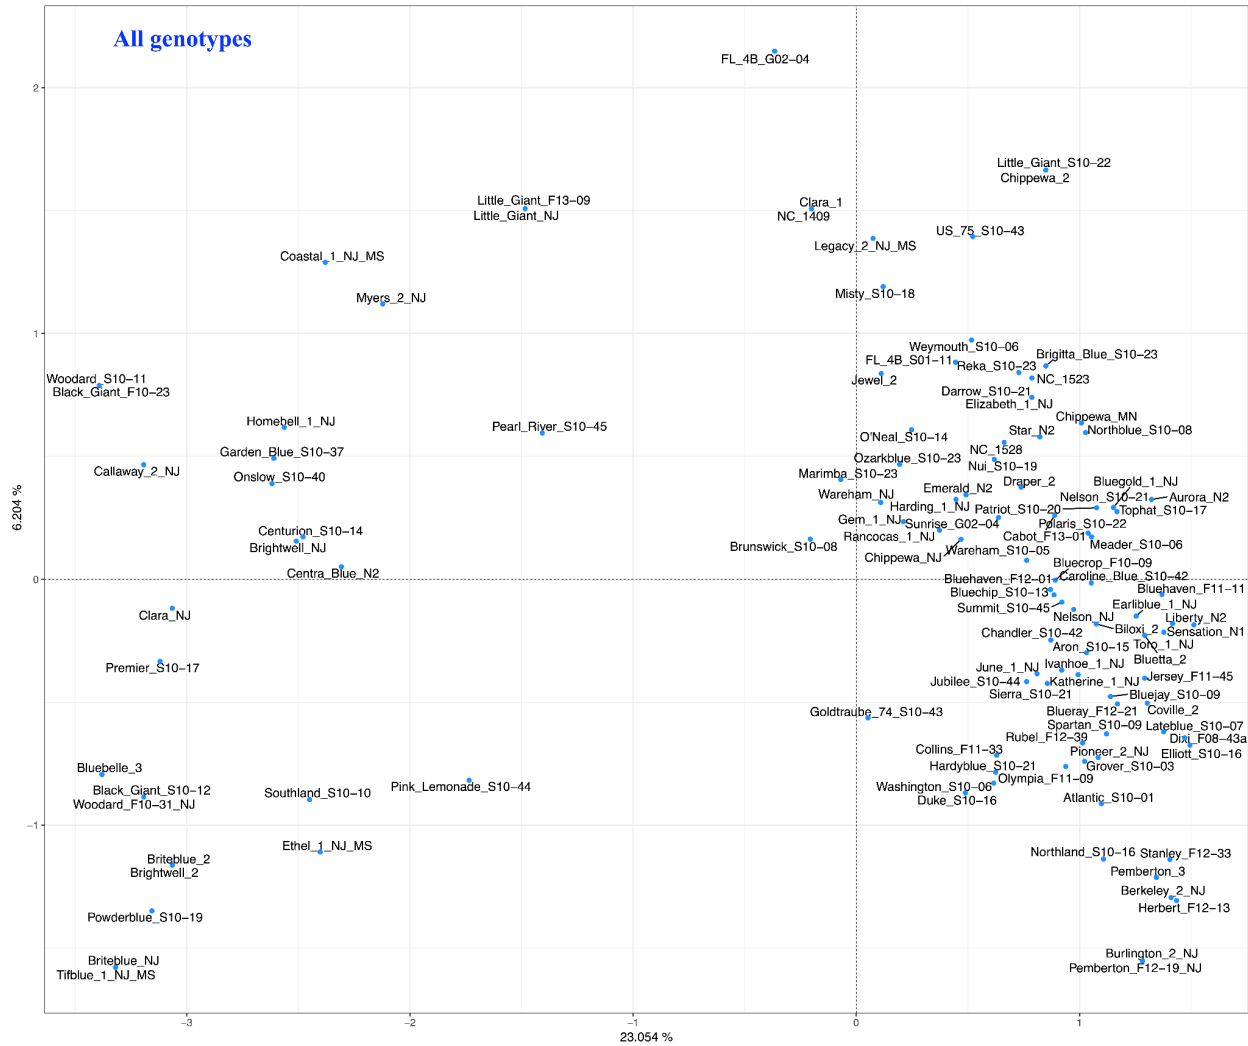

**Figure S1:** Principal component analysis of blueberry genotypes based on simple sequence repeat (SSR) markers.
